# Supplementary material
Source: PubMed Central journal article supplement (PMC3052414)

## Supporting Information

### Absolute Configuration of (-)-Gambogic Acid, an Antitumor Agent

Yulin Ren,<sup>†</sup> Chunhua Yuan,<sup>‡</sup> Hee-byung Chai,<sup>†</sup> Yuanqing Ding,<sup>§</sup> Xing-Cong Li,<sup>§,⊥</sup> Daneel Ferreira,<sup>§,⊥</sup> and A. Douglas Kinghorn<sup>\*,†</sup>

*Division of Medicinal Chemistry and Pharmacognosy, College of Pharmacy, The Ohio State University, Columbus, Ohio 43210, Campus Chemical Instrument Center, The Ohio State University, Columbus, Ohio 43210, National Center for Natural Products, School of Pharmacy, The University of Mississippi, University, Mississippi, 38677, Department of Pharmacognosy, School of Pharmacy, The University of Mississippi, University, Mississippi, 38677*

\* To whom correspondence should be addressed. Tel.: +1 614 247-8094. Fax: +1 614 247-8642.

E-mail: [kinghorn.4@osu.edu](mailto:kinghorn.4@osu.edu).

<sup>†</sup> Division of Medicinal Chemistry and Pharmacognosy, College of Pharmacy, The Ohio State University.

<sup>‡</sup> Campus Chemical Instrument Center, The Ohio State University.

<sup>§</sup> National Center for Natural Products, The University of Mississippi.

<sup>⊥</sup> Department of Pharmacognosy, The University of Mississippi.

## Table of contents

**Figure S1.** Mass spectrum of (-)-gambogic acid (**1**).

**Figure S2.**  $^1\text{H}$  NMR spectrum of (-)-gambogic acid (**1**).

**Figure S3.**  $^{13}\text{C}$  NMR spectrum of (-)-gambogic acid (**1**).

**Figure S4.** DEPT 90 NMR spectrum of (-)-gambogic acid (**1**).

**Figure S5.** DEPT 135 NMR spectrum of (-)-gambogic acid (**1**).

**Figure S6.** COSY NMR spectrum of (-)-gambogic acid (**1**).

**Figure S7a.** NOESY 2D NMR spectrum of (-)-gambogic acid (**1**).

**Figure S7b.** NOESY 2D NMR spectrum of (-)-gambogic acid (**1**).

**Figure S8.** HMQC 2D NMR spectrum of (-)-gambogic acid (**1**).

**Figure S9.** HMBC 2D NMR spectrum of (-)-gambogic acid (**1**).

**Figure S10.** Overlap profile of NOESY 2D NMR spectra of (-)-gambogic acid (**1**) and (-)-morellic acid (**2**).

**Figure S1.** Mass spectrum of (-)-Gambogic acid (**1**).

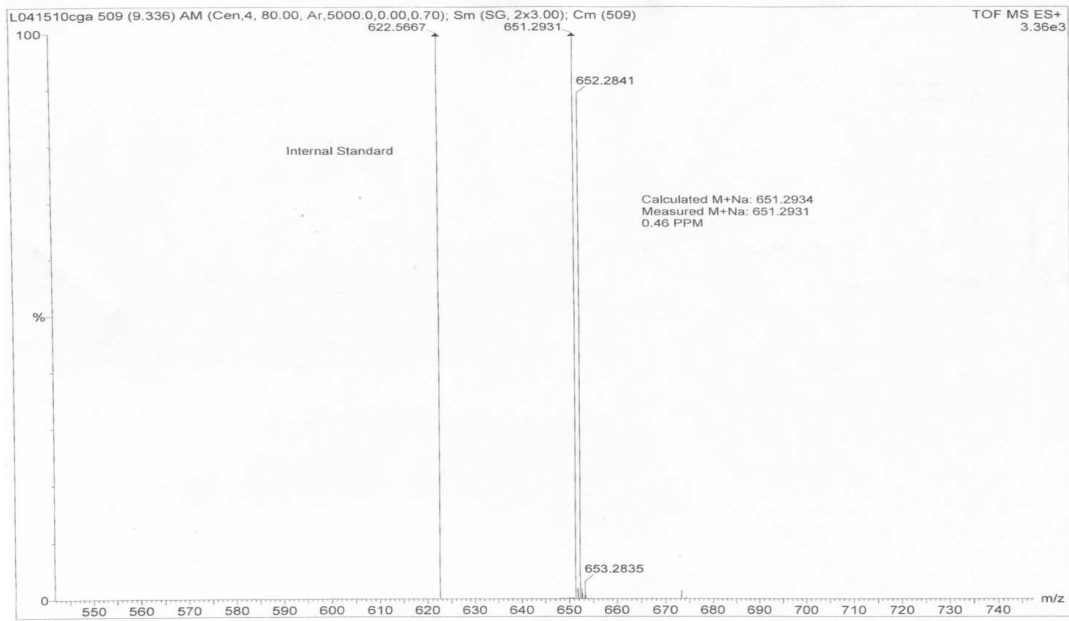

**Figure S2.** <sup>1</sup>H NMR spectrum of (-)-Gambogic acid (**1**).

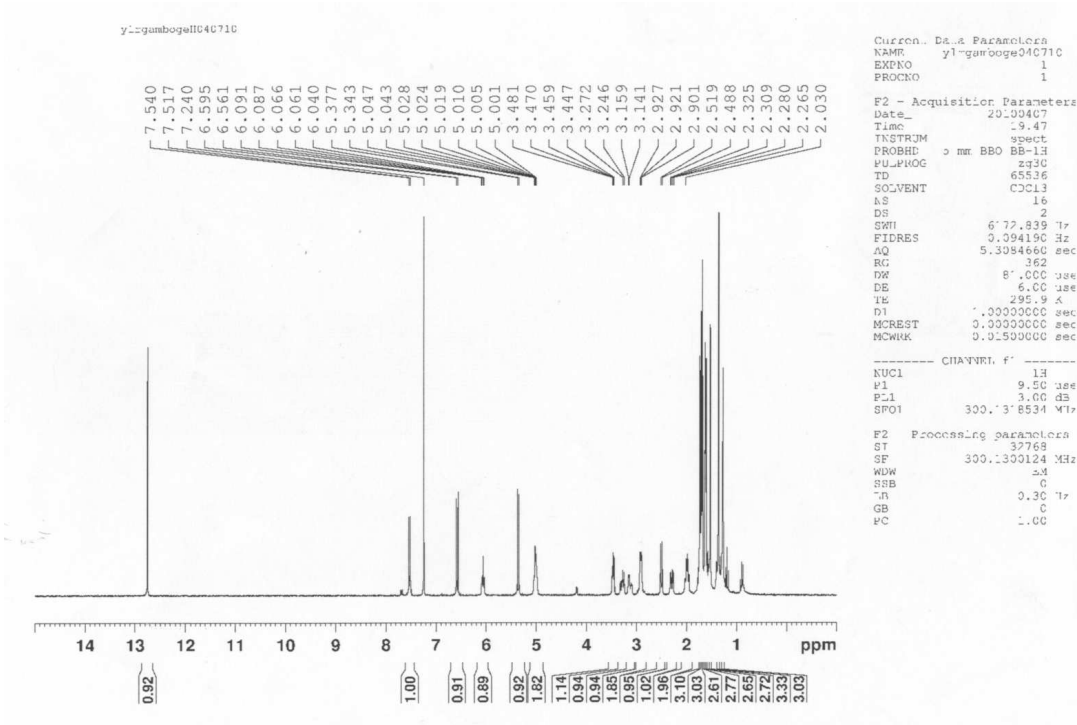

**Figure S3.**  $^{13}\text{C}$  NMR spectrum of (-)-Gambogic acid (**1**).

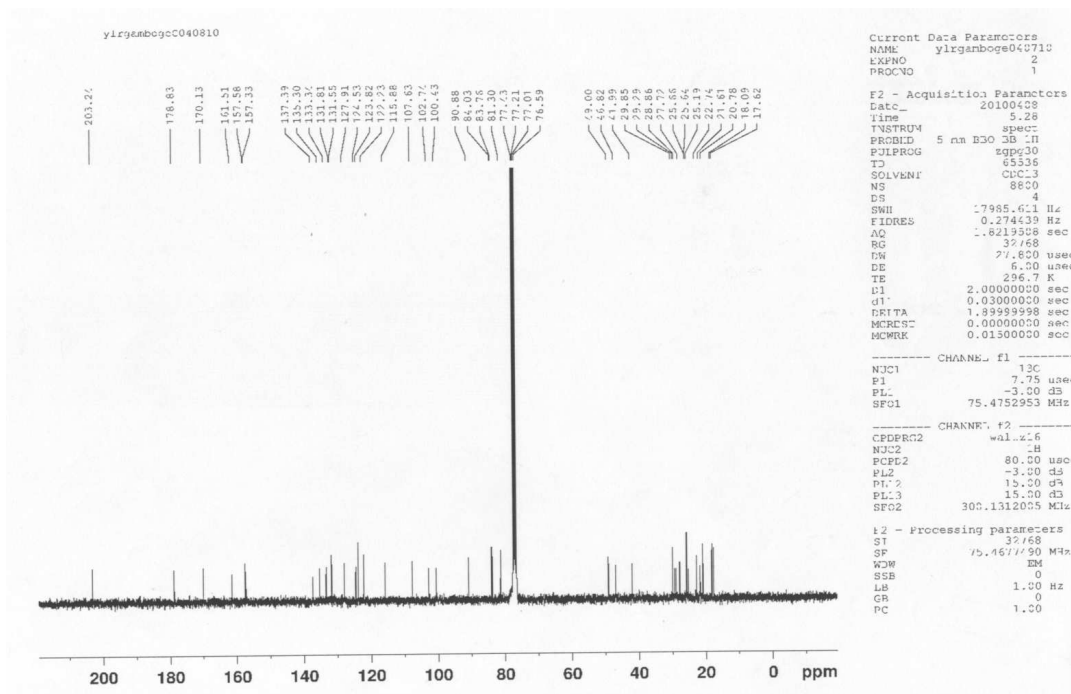

**Figure S4.** DEPT 90 NMR spectrum of (-)-Gambogic acid (**1**).

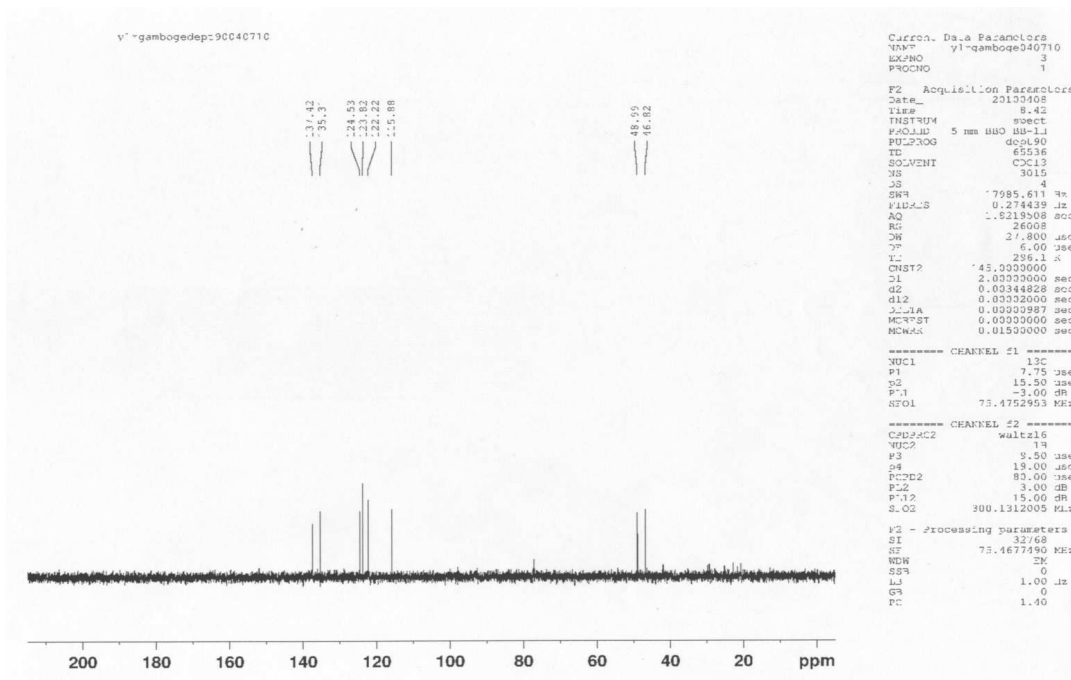

**Figure S5.** DEPT 135 NMR spectrum of (-)-Gambogic acid (**1**).

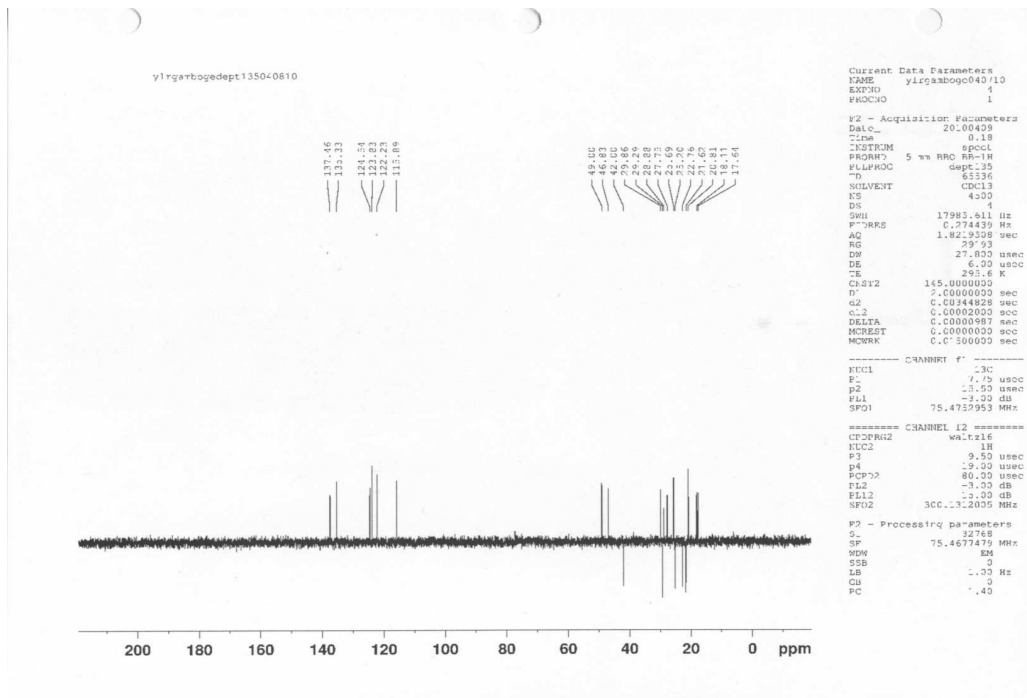

**Figure S6.** COSY NMR spectrum of (-)-Gambogic acid (**1**).

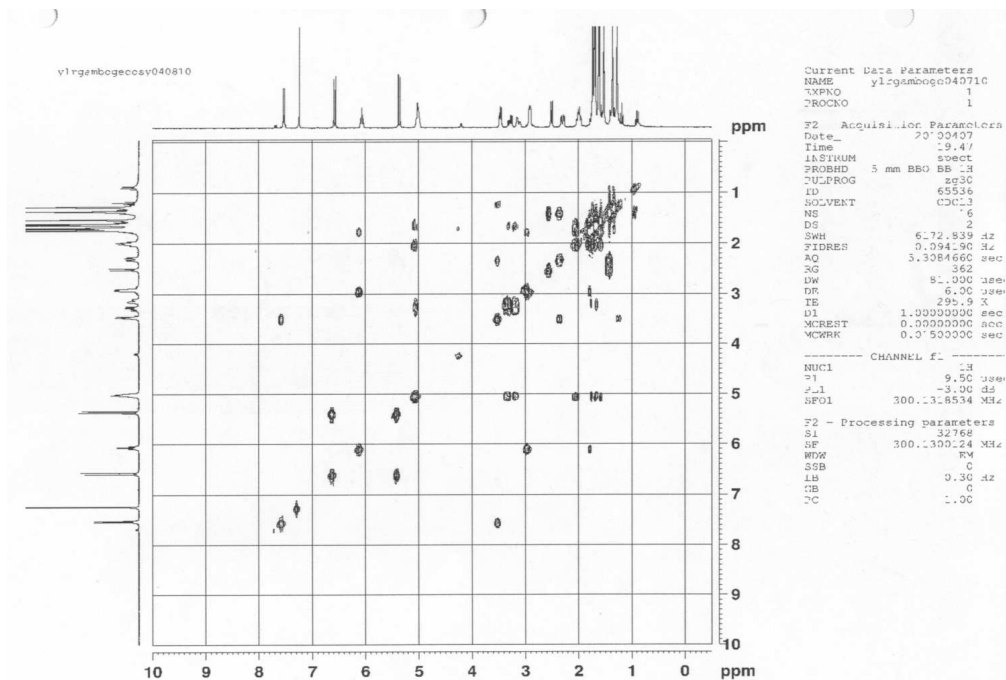

**Figure S7a.** ROESY 2D NMR spectrum of (-)-Gambogic acid (**1**).

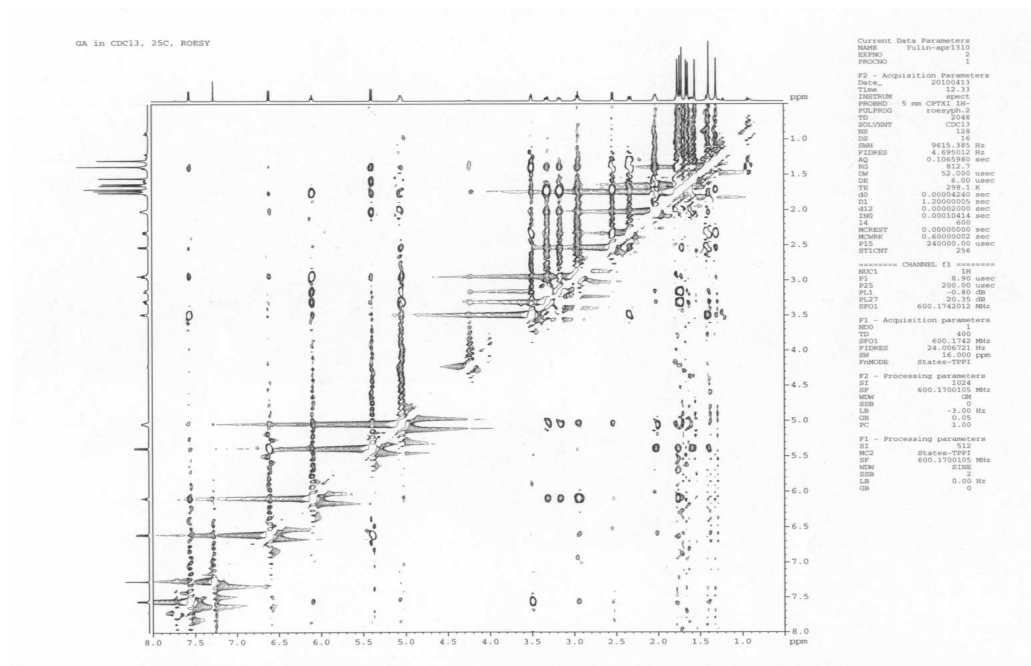

**Figure S7b.** ROESY 2D NMR spectrum of (-)-Gambogic acid (**1**).

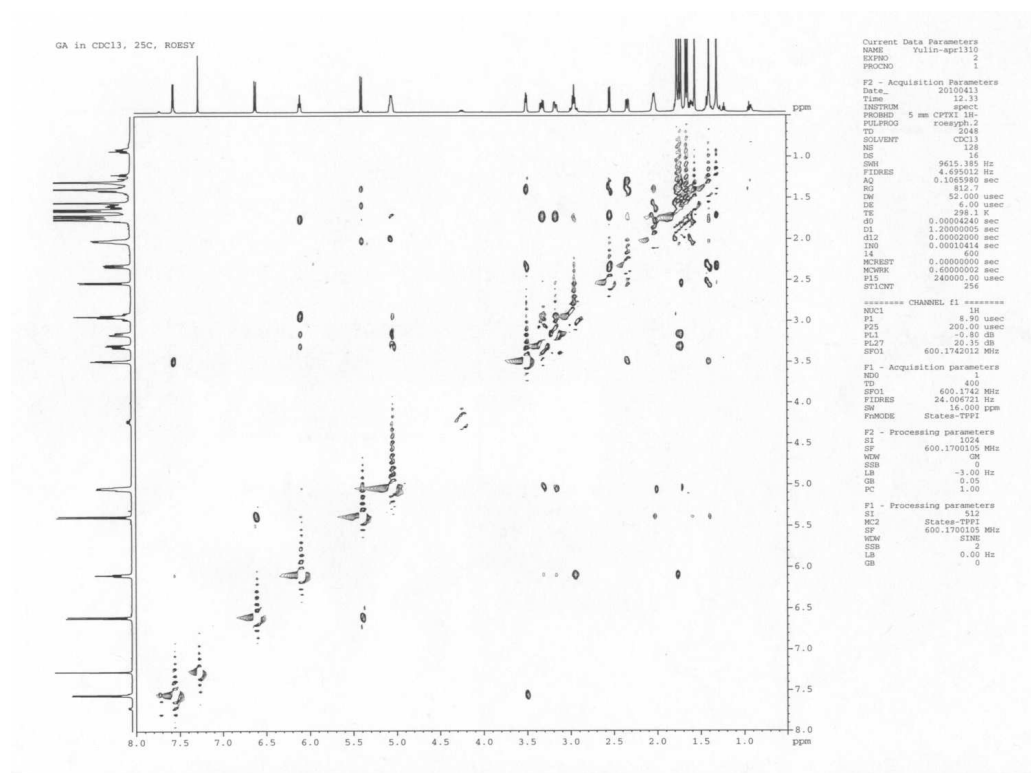

**Figure S8.** HMQC 2D NMR spectrum of (-)-Gambogic acid (**1**).

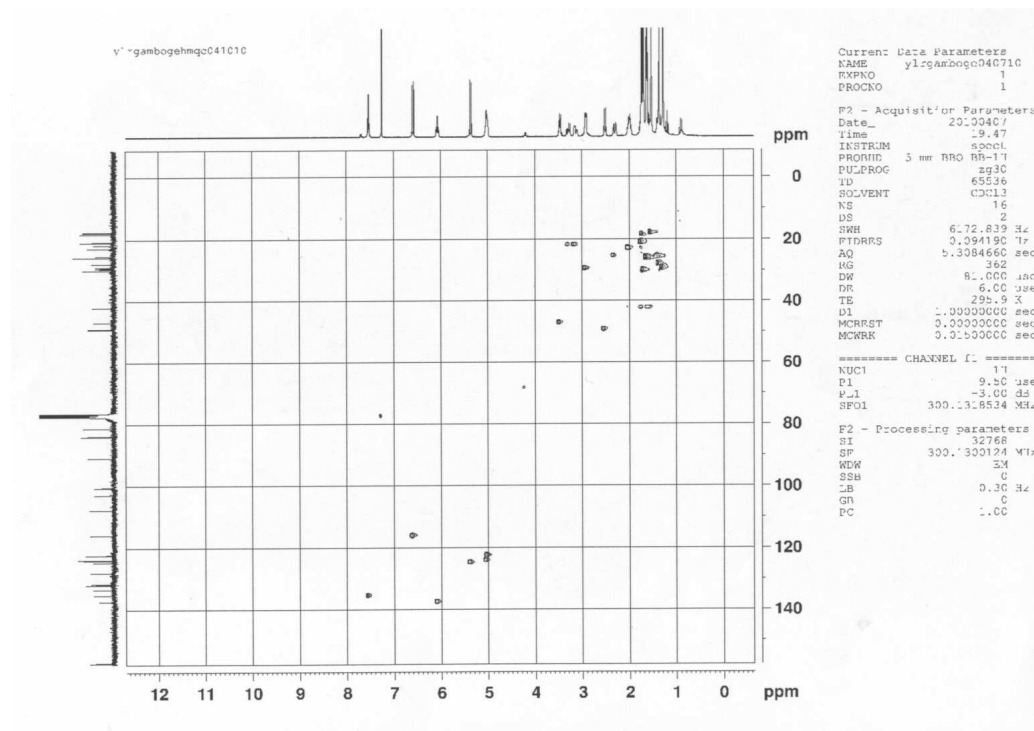

**Figure S9.** HMBC 2D NMR spectrum of (-)-Gambogic acid (**1**).

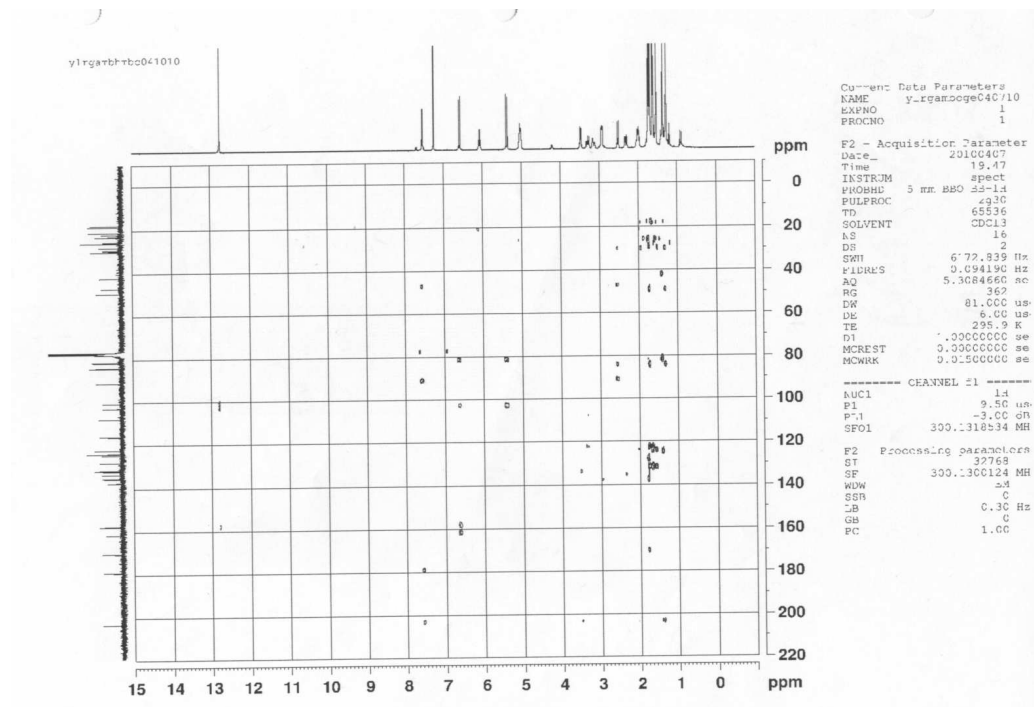

**Figure S10.** Overlap profile of ROESY 2D NMR spectrum of (-)-gambogic acid (**1**, red color) and NOESY 2D NMR spectrum of (-)-morellic acid (**2**, black color).

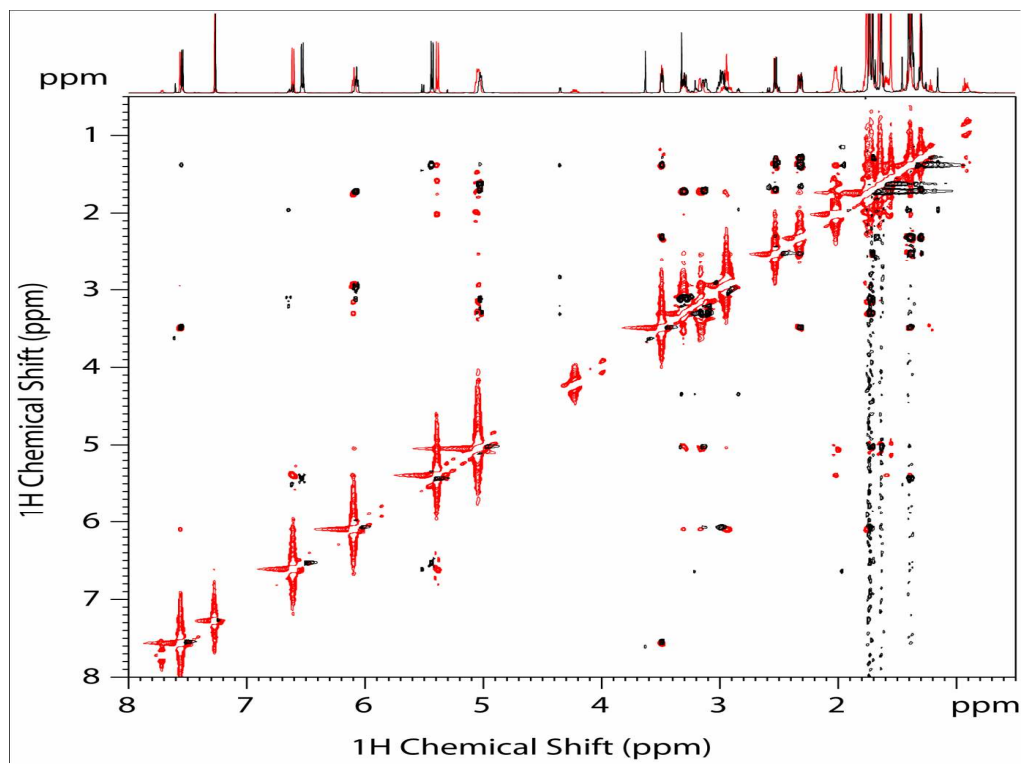

Supplement: NIHMS251936-supplement-1_si_002.pdf [file NIHMS251936-supplement-1_si_002.pdf]
